# Supplementary material
Source: Springer Nature journal article supplement (https://www.springermedizin.de/resource/supplementary/12935_2009_245_MOESM1_ESM.pdf/9540136)

1 2 3 4 5 6 7 8

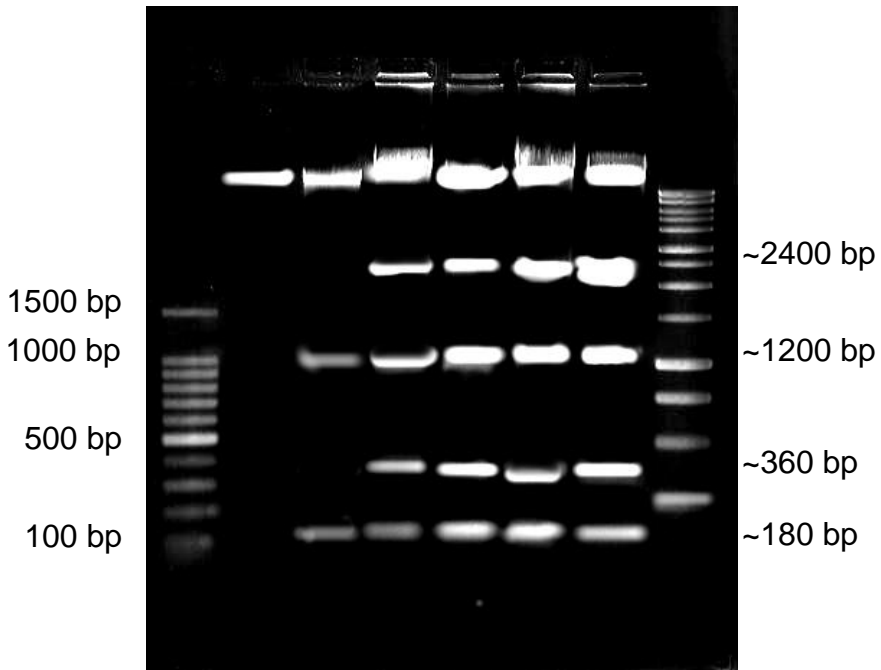

Supplement: MOESM1 [file 9540136]
